# Supplementary material for: The impact of family behaviors and communication patterns on chronic illness outcomes: a systematic review
Source: Springer Nature journal article supplement (doi:10.1007/s10865-011-9354-4), 2011-06-20
Supplement: MOESM2 [file 575964]

## Sheet: Sheet1
The Impact of Family Behaviors and Communication Patterns on Chronic Illness Outcomes: A Systematic Review Appendix B Details of Study Design, Behaviors Studied, Analysis, Outcomes, and Quality Ann-Marie Rosland, MD MS,1,2 Michele Heisler, MD MPA,1,2,3,4 John D. Piette, PhD1,2 1 Department of Veterans Affairs, Ann Arbor VA Center for Clinical Management Research, Ann Arbor, MI 2 University of Mic…
First Author	Publication Year	Disease	Diabetes Cohort Details	Design Cross-Sectional or Longitudinal	Follow-Up (if Longitudinal)	N eligible/sampled	N final	Country	% Female	Age range	Age mean (SD)	Race/Ethnicity: % Caucasian Non-Hispanic	Relationship Focus	Relationship Specific Criteria	Family Behavior #1	Behavior #1 General or Disease-Related	Behavior #1 Reporter	Behavior #1 Measurement Instrument	Behavior #1 Correlated - Category	Behavior #1 Correlated - Category	Behavior #1 Correlated - Specific	Behavior #1 NOT Correlated - Category	Behavior #1 NOT Correlated - Specific	Family Behavior #2	Behavior #2 General or Disease-Related	Behavior #2 Reporter	Behavior #2 Measurement Instrument	Behavior #2 Correlated - Category	Behavior #2 Correlated - Category	Behavior #2 Correlated - Specific	Behavior #2 NOT Correlated - Category	Behavior #2 NOT Correlated - Specific	Family Behavior #3	Behavior #3 General or Disease-Related	Behavior #3 Reporter	Behavior #3 Measurement Instrument	Behavior #3 Correlated - Category	Behavior #3 Correlated - Category	Behavior #3 Correlated - Specific	Behavior #3 NOT Correlated - Category	Behavior #3 NOT Correlated - Specific	Behavior #4	Behavior #4 Measurement Instrument	Behavior #4 General or Disease-Related	Behavior #4 Correlated - Category	Behavior #4 Correlated - Category	Behavior #4 Correlated - Specific	Behavior #4 NOT Correlated - Category	Behavior #4 NOT Correlated - Specific
Martire, L. M.	2006	Arthritis-Osteo		C		262	137	USA	70	over 50	69 (7.1)	95	S	married	Concordance on pain rating	D		Watch video of log carrying	Physiologic/ Symptom control		pain severity, physical function
Griffin, K. W.	2001	Arthritis-Rheumatoid		L	9 months		42	USA	64		55 (10)	98	S+	primary support provider with daily contact	Attentive Response	D	P	Significant Other Response Subscale	Physiologic/ Symptom control		"significant decrease in rheumatologist rated disease status"			Punishing Response	D	P	Significant Other Response Subscale	Physiologic/ Symptom control		rheumatologist disease activity rating (-)			Distracting Responses	D	P	Significant Other Response Subscale				Physiologic/ Symptom control	rheumatologist disease activity rating
Manne, S. L.	1989	Arthritis-Rheumatoid		C		144	103	USA	100	25-76	55	96	S	married	Spousal Criticism (dislike, disapprove, resent)	D	S	Camberwell Family Interview adapted, rating/counting of remarks	Disease QOL		psychological adjustment to disease, activity limitations
Manne, S. L.	1990	Arthritis-Rheumatoid		C			103	USA	100		55		S	married	Spousal Criticism (dislike, disapprove, resent)	D	S	Camberwell Family Interview adapted as above	Physiologic/ Symptom control		functional disability, adjustment to disease	Physiologic/ Symptom control	flareup frequency/duration, pain	Spouse Criticism-Percieved	G	P	new scale	Physiologic/ Symptom control, Disease QOL		pain, functional disability, adjustment	Physiologic/Symptom control	flareup frequency and duration
Nicassio, P. M.	1993	Arthritis-Rheumatoid		C			44 (RA)	USA	73 (RA)		55 (RA)		F	any	Family Control	G	O	Moos Family Environment Scale Subscale	Physiologic/ Symptom control		pain			Family Activity	G	O	Family Envionment Scale - Subscale	Physiologic/ Symptom control		disability
Waltz, M.	1998	Arthritis-Rheumatoid		L	1 year	288	234	Germany & Netherlands	68-73		56.4-57.6	NR	S	married	Negative Spouse Behavior	G	P	own scale	Physiologic/ Symptom control		pain
Williamson, D.	1997	Arthritis-Rheumatoid		C		56	52	USA	NR	28-76	57.2 (12.8)	NR	S	married	Spouse response (punishing, solicitous, distracting combined)	D	P	Multidimensional Pain Inventory (MPI)	Physiologic/ Symptom control		pain behavior (multivariate)			Marital Satisfaction	G	P	Locke Wallace Marital Adjustment Scale (MAS)				Physiologic/Symptom control	pain or pain behavior, both independent observer & spouse observer
Drory, Y.	1991	CAD		C			128	Israel	0		56 (8)	83	F	married	Family Cohesion - balance	G	P	FACES II Family Adaptability and Cohesion Evaluation Scale				Disease QOL	seven domains of psychosocial adjustment to illness	Family Adaptability	G	P	FACES II Family Adaptability and Cohesion Evaluation Scale				Disease QOL	same (psychosocial adjustment to illness)
Franks, M. M.	2006	CAD		L	6 months	101	94/65	USA	19		64.5 (10.1)	67	S	married	Social Control	D	O	4 items adapted	SMB (-)		healthy eating, servings of fruits and vegetables, maintained a diet low in fat, engaged in physical activity or exercise, avoided highly stressful situations, avoided physical overexertion, and minimized emotional upset.			Marital Satisfaction	G	P	Quality of Marriage Index	SMB		healthy eating, servings of fruits and vegetables, maintained a diet low in fat, engaged in physical activity or exercise, avoided highly stressful situations, avoided physical overexertion, and minimized emotional upset.
Chesla, C. A.	2004	Diabetes	All Type 2 Age limited to 25-70years Insulin 25% Oral meds 70% Diet only 5%	C		205	159	USA	60		54 (9)	0 (100%Af-Am)	F	someone considered family and a health partner (explained this was broadly defined due to African-American cultural reasons)	Family Structure/Organization	G	P	Togetherness Scale, 8 item scale assessing degree of interpersonal closeness, family roles and rules		Disease-QOL	DQOL-satisfaction scale (+)	Physiologic/ Symptom control, SMB	HbA1c, physical activity, diet	Family World View (world is "understandable, meaningful, manageable")	G	P	Family Coherence, 13-item scale	Disease-QOL	SMB	Diabetes QOL - impact subscale, physical activity	Physiologic/ Symptom control, SMB, Diabetes-QOL	HbA1c, Diabetes QOL-satisfaction, diet fat grams, diet calories	Emotion Management (unresolved disease-related conflict)	D	P	Unresolved Conflict Scale -- 5-item scale that measures diabetes-specific conflict	Disease QOL		DQOL-satisfaction, DQOL-impact (both -)	Physiologic/ Symptom control, SMB	HbA1c, physical activity, diet fat, diet calories
Edelstein, J.	1985	Diabetes	Type NR All adult (>=18 years) VA patients All on insulin	L	6 months	120	97	USA	0		55 (7.5)	80	F	living with family	Family Achievement Orientation	G	P	FES Family Environment Scale	Physiologic/ Symptom control		comprehensive measure of metabolic control: HbA1c, fasting blood glucose, triglycerides, cholesterol			Family Organization	G	P	FES Family Environment Scale	Physiologic/ Symptom control		Metabolic Control (-), as in Behavior #1			Family Conflict	G	P	Family Envionment Scale	Physiologic/ Symptom control		Metabolic Control (-) as in Behavior #1
Fisher, L.	2004	Diabetes	All Type 2 Age limited to 25-70 years Insulin 9% Oral meds 78% Diet only 13%	C		194	158	USA	41		56.9 (7.8)	0	S	spouse/partner + cohabitated x 3 years	Spouse Respect (disease related)	D	P	own scale	Health QOL		SF-36	Disease QOL	Diabetes-QOL	Couple Expressiveness	D	P	own scale				QOL		Conflict Resolution (unresolved disease-related conflict)	D	P	Tschann scale modified by Fisher et al 2000		QOL	Diabetes QOL
Fisher, L.	2000	Diabetes	All Type 2 Age limited to 25-62 years Insulin NR	C		262	187	USA	39	25-62	50	60	F+	spouse/partner + cohabitated x 3 years	Family Structure / Organization	G		Organized Cohesiveness Scale, assessing closeness and orderliness	ACT 24 (24hr physical activity) and diet for Lat only			Physiologic/ Symptom control, SMB, QOL (all for Cau)	HbA1c, BMI, Diabetes-QOL, ACT 24, diet observations	Family Sex Role Traditionalism	G		Family Sex-Role Traditionalism	QOL (+/-)		QOL (EA inc), disease QOL (LA dec)	Physiologic/ Symptom control, SMB	HbA1c, BMI, physical activity, diet	Family World View (world is "understandable, meaningful, manageable")	G		Family Coherence Scale	QOL		disease QOL (EA)	SMB, Physiologic/ Symptom control	HbA1c, BMI, physical activity, diet, disease QOL (LA)	Family Emotion Management (unresolved disease-related conflict)	Conflict Resolution Scale (high score = unresolved conflict)	D	QOL		QOL less (LA)	SMB, Physiologic/ Symptom control	HbA1c, BMI, physical activity, diet
Chesla, C. A.	2003	Diabetes	same as Fisher 2000 above	L	1 year	187	161	USA	39.8		49.2 vs. 52.6	64.6	F+	spouse/partner + cohabitated x 3 years	Family Structure / Organization	G	P? (say invited both but don't say who did questions)	Organized Cohesiveness Scale, assessing closeness and orderliness				Physiologic/ Symptom control, SMB, QOL	HbA1c, Diabetes-QOL, diet, activity	Family World View (world is "understandable, meaningful, manageable")	G		Family Coherence	SMB (-), QOL(+)		increase QOL EA (+), increase change calorie overeat LA (-)	SMB, QOL	change in physical activity	Family Emotion Management (unresolved disease-related conflict)	D		Unresolved Conflict Scale of Multidimensional Assessment ( 5 items), Interparental Conflict - Modified	SMB (-)		change dietary intake amount EA (-)	Physiologic/ Symptom control, SMB	Change in physical activity, HbA1c, disease QOL, SF 36-QOL
Garay-Sevilla, M.E.	1995	Diabetes	Type NR None on insulin Age limited to 19-85 years	C		1000	200	Mexico	66		58		F+	any	Family Functioning (6 domains)	G		own scale based on McMaster model				SMB	diet and medication adherence
Hagedoorn, M.	2006	Diabetes	67% Type 1 All on insulin Age limited to 18-75 years	L	3 months	126	67	Netherlands	53		45.4 (10.6)		S	heterosexual spouse/partner + cohabitate x 1 year	Partner Overprotection	D	P	6 item scale, referenced	Disease-QOL		PAID (diabetes-related distress)	Physiologic/ Symptom control	HbA1c
Konen, J. C.	1993	Diabetes	Type NR Insulin 20% All adults (>= 18years)	C			409	USA	54		53 (16)	60	F	NR	Family Cohesion	G	P	FACES III Family Adaptability and Cohesion Evaluation Scale - Cohesion Subscale				Physiologic/ Symptom control	glycemic control (HbA1c < or = 7.0%)
Trief, P. M.	1998	Diabetes	54% Type 1 All on insulin All adults (>=18 years)	C		NR	150	USA	44	20-79	51.3 (15.5)	96.7	F	any	Family Cohesion	G	P	Family Environment Scale - Cohesion	Physiologic/ Symptom control		SF 36 physical function, pain	Physiologic/ Symptom control, QOL	HbA1c, Diabetes-QOL	Family Conflict	G	P	Family Environment Scale - Conflict				Physiologic/ Symptom control, QOL	HbA1c, Diabetes-QOL
Trief, P. M.	2001	Diabetes	57% Type 1 All on insulin Age limited to 18-55 years	C		NR	78	USA	57.7	25-65 (discrepancy between max age of participants and age inclusion criteria)	45.8 (11.3)	NR	S	married	Marital Intimacy	G	P	PAIR Personal Assessment of Intimacy		Disease-QOL	diabetes distress (PAID), diabetes QOL-satisfaction	Physiologic/ Symptom control, Disease-QOL	HbA1c, diabetes QOL-impact, SF 36 physical composite score	Marital Adjustment	G	P	DAS Dyadic Adjustment Scale	QOL		PAID diabetes distress, Diabetes QOL-satisfaction and impact	Physiologic/Symptom control, QOL	HbA1c, SF 36 physical composite
Trief, P. M.	2002	Diabetes	same as Trief 2001 above	L	2 years	78	61	USA	62		47.1 (11.6)	NR	S	married	Marital Intimacy	G	P	PAIR Personal Assessment of Intimacy-baseline		Disease-QOL	T2 DQOL-satisfaction scale	Physiologic/ Symptom control, QOL	T2 HbA1c, change in HbA1c, T2 SF 36 physical, T2 PAID diabetes distress, T2 DQOL-impact	Marital Adjustment	G	P	DAS Dyadic Adjustment Scale-baseline	QOL		T2 PAID diabetes distress, T2 disease QOL-satisfaction	Physiologic/ Symptom control,QOL	T2 HbA1c, change HbA1c T2 Diabetes QOL-impact, T2 SF36 physical
Trief, P. M.	2004	Diabetes	same as Trief 2001 above	L	2 years	78	60	USA	42		45.7 (11.4)	NR	S	married	Marital Intimacy	G	P	PAIR Personal Assessment of Intimacy-baseline		SMB	baseline diet - composition, baseline diet - calories, baseline adherence to physical activity, baseline adherence to physician reccomendations	Physiologic/ Symptom control, SMB	baseline and T2 HbA1c, change HbA1c, baseline glucose test, T2 any SMB (diet, physical activity, glucose test, adherence to physician)	Marital Adjustment	G	P	DAS Dyadic Adjustment Scale -baseline	SMB		baseline diet - calories, baseline physical activity, baseline adhere to physician reccomendations	SMB, Physiologic/ Symptom control	baseline diet - composition, baseline glucose testing, T2 HbA1c, change HbA1c, T2 any SMB (diet, activity, glucose testing, adhere to physician)
Kimmel	2000	ESRD		L	5 years	overall recruit rate 60.8%, used 59% that were in relationship	174	USA	23	21-80	54 (13.8)	9.2	S	spouse/partner for 6 months	Marital Adjustment ("Satisfaction")	G	P	Dyadic Adjustment Scale	Mortality		mortality			Negative Dyadic Adjustment	G	q	DAS Negativity	Mortality		mortality
Rohrbaugh, M. J.	2008	Heart Failure		L	6 months	NR	57	USA	28	67	11.7	85	S	spouse	spouse "we" talk	D	B	Interview auto analysis by Linguistic Inquiry and Word Count software	Physiologic/ Symptom control		heart failure symptoms, SF36 mental health and physical health combined
Coyne, J. C.	2001	Heart Failure		L	4 years	201	189	USA	21	29-78	53	83	S	married	Marital Quality	G/D	B	Composite of 3 Measures (marital satisfaction Coyne&Smith, Family Time and Routines/Fam Routine Inventory combine/adapted, useful illness discussions) and Observed positivity/neg ratio w video of disagreement discussion (Coded w Living in Familial Environments system)	Mortality		all cause mortality
Benazon, N. R.	2006	Heart Failure		L	4 years	201	184	USA	26	26-78	53	83	S	married	Spouse Expressed Emotion	?what was taped speech about	S	Five Minute Speech Sample	Mortality		mortality			Marital Function			same as Coyne 2001	mortality		heart failure survival
Rohrbaugh, M. J.	2006	Heart Failure		L	8 years	201	189	USA	26	29-78	53	83	S	married	Marital Quality	G/D	B	same as Coyne 2001	Mortality		mortality			Useful Illness Discussion	D	B	same as Coyne 2001	mortality		mortality			Positive/negative ratio during video discussion ("many but not all to do with health")	G		see Coyne 2001	mortality		mortality
Baker, B.	1999	HTN		C		NR	205	Canada	34.6		46.3	75.7	S	NR	Marital Cohesion	G	P	Dyadic Adjustment Scale - Subscale	Physiologic/ Symptom control		night blood pressure, 24 hour diastolic blood pressure
Baker, B.	2000	HTN		L	3 years	103	72	USA	38		47 (8)	74	S	NR	Marital Adjustment	G		Dyadic Adjustment Scale	Physiologic/ Symptom control		ambulatory blood pressure, left ventricular mass			Marital Cohesion	G		DAS Dyadic Adjustment Scale -Subscale	Physiologic/ Symptom control		ambulatory blood pressure			Satisfaction	G		DAS Subscale	Physiologic/ Symptom control		ambulatory blood pressure
Baker, B.	2003	HTN		L	3 years	103	103 for some/72 for echo outcomes	USA	38	20-65	47 (8)	74	S	NR	Marital Support	G		Dyadic Adjustment Scale - subscale combination (upper 3 quartiles of satisf & cohesion subscale vs not)	Physiologic/ Symptom control		ambulatory blood pressure, left ventricular mass
Trevino, D. B.	1990	HTN		C		200	109	USA	58	27-63	50.5	65.1	S	married	Marital Adjustment	G	P	DAS Dyadic Adjustment Scale	Physiologic/ Symptom control, SMB		forget meds, stop meds, overweight	Physiologic/ Symptom control, SMB	mean diastolic blood presure x 3 readings, quit smoking, alcohol use, exercise
	Footnotes: Articles about same cohort grouped and shaded in grey
	Abbreviations: F=female, yo=years old, Cau=Caucasian, Lat=Latino, Af Am=African-American, C=cross-sectional, L=longitudinal, NR=not reported, T1=time 1, T2=time 2
	S=spouse or one partner, F=larger family unit, G=general, D=disease-related, P=patient, B=both, O=other
	CAD=coronary artery disease, COPD=chronic obstructive pulmonary disease, ESRD=end stage renal disease, QOL=quality of life, SMB=Self-management behavior, BMI=body mass index, HbA1c=hemoglobin A1c, FBG=fasting blood glucose
[truncated: 4 more columns]
